# Supplementary material
Source: PubMed Central journal article supplement (PMC3430530)
Supplement: supp_112.141986_FigureS1.pdf [file supp_112.141986_FigureS1.pdf]

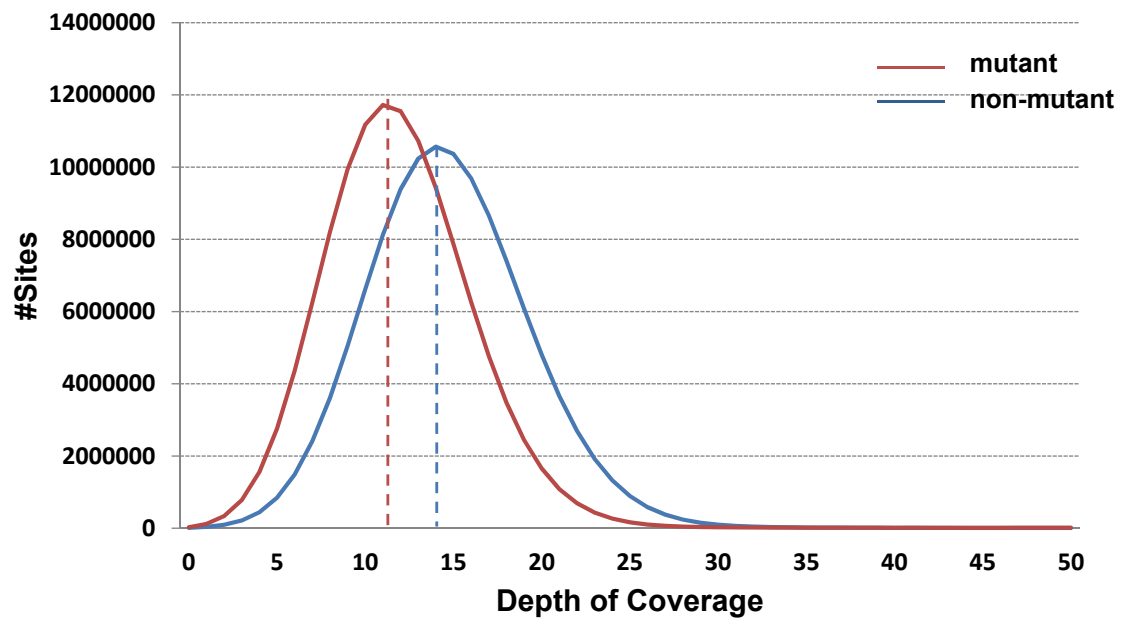

**Figure S1** Distribution of the depth of coverage from single-end 51 bp sequencing on Illumina Hi-Seq. The mutant pool has on an average of 11 x coverage and the non mutant pool has on an average of 14 x coverage.
